1 **Full Title:** Ability of Caprini and Padua Risk-Assessment Models to Predict Venous Thromboembolism in a  
2 Nationwide Study

3  
4 **Author Names:**

5 Hilary Hayssen, MD<sup>1,2</sup>, Shalini Sahoo, MA<sup>1,2</sup>, Phuong Nguyen, PhD<sup>3</sup>, Minerva Mayorga-Carlin, MPH<sup>1,2</sup>, Tariq  
6 Siddiqui, MS<sup>2</sup>, Brian Englum, MD<sup>1</sup>, Julia F Slejko PhD<sup>4</sup>, C. Daniel Mullins PhD<sup>4</sup>, Yelena Yesha, PhD<sup>3</sup>, John D  
7 Sorkin, MD, PhD<sup>5,6</sup>, Brajesh K Lal, MD<sup>1,2</sup>

8  
9 **Affiliations:**

0 <sup>1</sup> Department of Surgery, University of Maryland, Baltimore, MD  
1 <sup>2</sup> Surgery Service, VA Medical Center, Baltimore, MD  
2 <sup>3</sup> Department of Computer Science, University of Miami, FL  
3 <sup>4</sup> Department of Health Services Research, Univ of Maryland, MD  
4 <sup>5</sup> Department of Medicine, University of Maryland School of Medicine, Baltimore, MD  
5 <sup>6</sup> Geriatric Research, Education, and Clinical Center, VA Medical Center, Baltimore, MD

6  
7 **Short title:** Caprini and Padua VTE RAMs in a Nationwide Study

8  
9 **Corresponding author and post-publication corresponding author:**

0 Brajesh K Lal MD  
1 Department of Surgery, University of Maryland  
2 22 South Greene Street  
3 Baltimore, MD 21201  
4 Phone: 410 328 5840  
5 Email: [blal@som.umaryland.edu](mailto:blal@som.umaryland.edu)

6  
7 **Word count:**

8 Abstract: 349  
9 Manuscript word count: 3,893  
0 Total word count (including title page, abstract, references, tables, figures, figure legends, and supplementary  
1 material): 7,496  
2  
3

## 1 ABSTRACT

2 **Background:** Venous thromboembolism (VTE) is a preventable complication of hospitalization. Risk-  
3 stratification is the cornerstone of prevention. The Caprini and Padua are the most commonly used risk-  
4 assessment models to quantify VTE risk. Both models perform well in select, high-risk cohorts. While VTE  
5 risk-stratification is recommended for all hospital admissions, few studies have evaluated the models in a large,  
6 unselected cohort of patients.

7 **Methods:** We analyzed consecutive first hospital admissions of 1,252,460 unique surgical and non-surgical  
8 patients to 1,298 VA facilities nationwide between January 2016 and December 2021. Caprini and Padua scores  
9 were generated using the VA's national data repository. We first assessed the ability of the two RAMs to  
0 predict VTE within 90 days of admission. In secondary analyses, we evaluated prediction at 30 and 60 days, in  
1 surgical versus non-surgical patients, after excluding patients with upper extremity DVT, in patients  
2 hospitalized  $\geq 72$  hours, after including all-cause mortality in the composite outcome, and after accounting for  
3 prophylaxis in the predictive model. We used area under the receiver-operating characteristic curves (AUC) as  
4 the metric of prediction.

5 **Results:** A total of 330,388 (26.4%) surgical and 922,072 (73.6%) non-surgical consecutively hospitalized  
6 patients (total  $n=1,252,460$ ) were analyzed. Caprini scores ranged from 0-28 (median, interquartile range: 4, 3-  
7 6); Padua scores ranged from 0-13 (1, 1-3). The RAMs showed good calibration and higher scores were  
8 associated with higher VTE rates. VTE developed in 35,557 patients (2.8%) within 90 days of admission. The  
9 ability of both models to predict 90-day VTE was low (AUCs: Caprini 0.56 [95% CI 0.56-0.56], Padua 0.59  
0 [0.58-0.59]). Prediction remained low for surgical (Caprini 0.54 [0.53-0.54], Padua 0.56 [0.56-0.57]) and non-  
1 surgical patients (Caprini 0.59 [0.58-0.59], Padua 0.59 [0.59-0.60]). There was no clinically meaningful change  
2 in predictive performance in patients admitted for  $\geq 72$  hours, after excluding upper extremity DVT from the  
3 outcome, after including all-cause mortality in the outcome, or after accounting for ongoing VTE prophylaxis.

4 **Conclusions:** Caprini and Padua risk-assessment model scores have low ability to predict VTE events in a  
5 cohort of unselected consecutive hospitalizations. Improved VTE risk-assessment models must be developed  
6 before they can be applied to a general hospital population.

## 1 INTRODUCTION

2 Venous thromboembolism (VTE), encompassing deep vein thrombosis (DVT) and pulmonary embolism  
3 (PE), is a potentially preventable sequela of hospitalization. Over 900,000 VTE events, associated with over  
4 100,000 deaths, and an attendant economic burden of \$2-10 billion are reported each year in the United States  
5 (US).<sup>1,2</sup> Summarizing evidence-based guidelines, the US Surgeon General emphasized “the need to screen  
6 hospitalized patients for risk of DVT/PE and to provide appropriate prophylaxis to those at risk.”<sup>3</sup> The Joint  
7 Commission on the Accreditation of Healthcare Organizations, the Agency for Healthcare Research and  
8 Quality, and the Centers for Disease Control and Prevention have each identified risk-assessment and risk-  
9 stratification as the keys to improving VTE prevention in all general hospitalized patients.<sup>4</sup>

0 At least 23 VTE risk-assessment models (RAMs) have been developed to quantify a patient’s risk for  
1 VTE by summing the weights assigned to selected clinical risk-factors.<sup>5</sup> By mapping ranges of scores into  
2 ordered groups, the RAMs attempt to accomplish risk-stratification. The models are designed to be  
3 implemented in all hospital admissions, not just high-risk patient groups. The Caprini and Padua RAMs are the  
4 most widely used RAMs in hospitals. Risk-factors and weights in both RAMs were selected based on clinical  
5 expertise and information from published literature.<sup>6</sup> The Caprini RAM has been evaluated in high-risk  
6 subgroups of surgical patients<sup>7,8</sup> and the Padua RAM in acutely ill medical patients.<sup>9 10,11</sup> While both RAMs  
7 have been tested primarily in high-risk subsets, guidelines suggest using the Caprini RAM in all hospitalized  
8 surgical patients<sup>8,12</sup> and the Padua RAM in all hospitalized non-surgical patients.<sup>10,11</sup>

9 Increased awareness about the clinical and cost implications of hospital-associated VTE, and the push to  
0 implement risk-stratification by healthcare organizations, has led to an increasing use of the Caprini and Padua  
1 RAMs for all hospital admissions. However, neither RAM has been well-studied in a large, unselected cohort of  
2 mixed non-surgical and surgical patients.<sup>6,13</sup>

3 We evaluated the predictive ability of the Caprini and Padua RAMs for 90-day VTE in patients  
4 hospitalized at Veterans Affairs (VA) health care facilities nationwide over a 6-year period. In secondary  
5 analyses, we assessed predictive performance in subgroups of surgical and non-surgical patients, in patients

1 admitted for  $\geq 72$  hours, after including all-cause mortality in the outcome, after excluding upper extremity DVT  
2 from the outcome, and after accounting for prophylaxis in the predictive model.

## 4 METHODS

5 **Study Design and Participants:** We performed a retrospective analysis of the first hospital admission  
6 of patients to any VA facility nationwide from January 1, 2016, through December 1, 2021. We followed  
7 STROBE (Strengthening the Reporting of Observational Studies in Epidemiology) guidelines for cohort studies  
8 in writing this report.<sup>14</sup> Patients with a VTE within 90 days before admission or those admitted with a diagnosis  
9 of VTE were excluded. Patients who underwent a surgical procedure (planned or unplanned) during  
0 hospitalization, regardless of the admitting service, were defined as surgical patients. Non-surgical patients were  
1 those who did not undergo a surgical procedure during hospitalization. The protocol was approved by the  
2 Institutional Review Board of the University of Maryland and the Baltimore VA Research and Development  
3 Committee.

4 **Data Source:** Data were obtained from the Veterans Affairs Informatics and Computing Infrastructure  
5 (VINCI), a comprehensive, patient-level database of the approximately 9 million patients receiving care at  
6 1,298 VA healthcare facilities nationwide.<sup>15,16</sup> VINCI contains all data entered into the VA's common  
7 electronic medical record from in- and out-patient encounters.

8 **Outcome and variables:** Our main outcome, VTE, was defined as a new International Classification of  
9 Diseases (ICD-10) code diagnostic for PE, DVT, or both DVT and PE (**Table S1**). The Caprini RAM computes  
0 a composite score based on the sum of weighted scores of 34 risk-factors.<sup>8</sup> The Padua RAM computes a  
1 composite score based on 11 risk-factors.<sup>9</sup> We computed both scores for each patient using information from  
2 their medical record. The risk factors were extracted from various sources: ICD-10 diagnostic and procedural  
3 codes, Current Procedural Terminology (CPT) codes, demographic data, clinical and nursing orders, laboratory  
4 data, medications, prosthetics consultations, and operating room data. Extracted data included date and time  
5 stamps that permitted calculation of length of surgery, duration of bedrest, or date of VTE diagnosis, for  
6 example. If there were no admission height or weight measurements, we imputed the body mass index (BMI)

1 using the average of heights and weights obtained within the year before and after admission, after which BMI  
2 was available in 96% of patients.

3 We categorized patients as receiving pharmacologic VTE prophylaxis based on medication orders for  
4 unfractionated heparin, low molecular weight heparins, direct-acting oral anticoagulants, or warfarin as well as  
5 CPT codes for inferior vena cava filter placement. We determined if patients received mechanical prophylaxis  
6 based on physician orders for intermittent or sequential compression devices.

7

## 8 **Statistical Methods**

9 We compared demographic and clinical features of our cohort and of the risk-factors included in the  
0 Caprini and Padua RAMs for those with and without VTE, using Person's  $\chi^2$  analysis for categorical variables  
1 and Student's t-test for continuous variables. We used histograms to describe the distribution of RAM scores in  
2 patients who did and did not develop VTE, and to describe the relationship between RAM scores and VTE.  
3 Logistic regressions in which outcome (yes versus no) was predicted by the Caprini or Padua scores, were used  
4 to determine the ability of the two RAMs to predict outcomes of interest and in subsets of interest. Predictive  
5 ability was quantified by measuring the area under the receiver-operating characteristic curves (AUC) obtained  
6 from the logistic regressions. The AUCs of different models were compared using Delong-Delong tests.<sup>17</sup>  
7 Analyses were performed using R version 4.0.1 (R Core Team, Vienna, Austria) and SAS software version 9.4  
8 (SAS Institute Inc., Cary, North Carolina, USA).

9 We first evaluated the ability of each RAM to predict VTE in the entire cohort at various time intervals,  
0 including 0-30, 31-60, 61-90, and 0-90 days (i.e., four logistic regressions for each RAM). These models  
1 adjusted only for the patients' RAM score. To maximize the number of VTE events included, all subsequent  
2 secondary analyses examined outcomes at a single follow-up interval of 0-90 days (our baseline models).

3 In a series of secondary analyses, we evaluated whether each RAM had better predictive ability (AUC)  
4 in various sub-populations of the cohort, or for different outcomes of interest. We first evaluated the prediction  
5 of 90-day VTE for each RAM in subgroups of the overall cohort: 1) surgical patients, 2) non-surgical patients,  
6 and 3) patients admitted for  $\geq 72$  hours, as a surrogate for increased immobility. Next, we evaluated the

1 prediction of 90-day outcome of 4) VTE excluding upper extremity DVTs (because upper extremity DVTs have  
2 lower morbidity and mortality) and 5) after including all-cause mortality into the composite outcome (i.e., VTE  
3 and/or mortality) since acute PE may remain undetected as a cause of sudden death. Finally, we examined  
4 prediction of 90-day VTE by the two RAMs in 6) a subgroup of patients who received VTE prophylaxis  
5 (mechanical and/or pharmacologic), 7) a subgroup of patients who did not received VTE prophylaxis, and 8) in  
6 the entire cohort after adjusting for any prophylaxis received because prophylaxis may alter the predictive  
7 ability of RAMs (prophylaxis is not accounted for in the Caprini or Padua RAMs)

## 9 RESULTS

0 **Participants:** A total of 1,282,014 patients were hospitalized from January 1, 2016, to December 1,  
1 2021. We excluded 21,974 patients admitted with a diagnosis of VTE and 7,580 patients with a VTE within 90  
2 days before admission. Our study population included 1,252,460 patients, of whom 26.4% (n=330,388) were  
3 surgical and 73.6% (n= 922,072) were non-surgical patients (**Table 1**). The overall population was older (mean  
4 age 65.9 years), predominantly male (93.0%), a substantial minority were non-white (29.8%), and almost 41%  
5 received no VTE prophylaxis.

6 **Outcome data:** Within 90 days after admission, 35,557 patients (2.8%) developed a VTE, of which  
7 15,056 (42%) were PEs with or without concurrent DVT, and 20,501 were DVTs alone (58%). The median  
8 time (interquartile range, IQR) to VTE occurrence was 11 days (4-35). Although most VTEs developed within  
9 the first 30 days of admission, 28% developed 31-90 days later (17% at days 31-60, 11% at days 61-90, **Table**  
0 **2**).

1 **Descriptive data (Table 1):** Patients who suffered a VTE (VTE group) were on average older than  
2 those who did not suffer a VTE (non-VTE group; 68.1 vs. 65.8 years,  $p<0.001$ ). Although the difference was  
3 not clinically important, the VTE group had a lower BMI than the non-VTE group (29.2 vs. 29.3 kg/m<sup>2</sup>,  
4  $p=0.018$ ). The fraction who were male was slightly higher in the VTE group than in the non-VTE group (95.2%  
5 vs. 92.9%,  $p<0.001$ ). The fraction who were black was higher in the VTE group than in the non-VTE group  
6 (24.3% vs. 20.8% respectively,  $p<0.001$ ).

1 Fourteen of the 34 risk-factors in the Caprini RAM were associated with an increased risk of VTE  
2 (varicose veins, recent major surgery, swollen legs, heart attack, congestive heart failure, serious infection, lung  
3 disease, age 61-74 years, cancer, central venous catheter, age  $\geq 75$  years, bedrest  $\geq 72$  hours, history of VTE,  
4 history of clotting disorder, broken hip, pelvis, or leg, and spinal cord injury resulting in paralysis, **Table 3**).  
5 Nine of the 11 risk-factors in the Padua RAM were associated with an increased risk of VTE (infection or  
6 rheumatologic disorder, heart attack and/or stroke, heart and/or respiratory failure, age  $\geq 70$  years, recent trauma  
7 and/or surgery, thrombophilia, bedrest  $\geq 3$  days, previous VTE, and active cancer, **Table 3**). Some risk-factors in  
8 the Caprini RAM (age 41-60 years, planned minor surgery, inflammatory bowel disease, BMI  $> 25$  kg/m<sup>2</sup>,  
9 hormone therapy, planned major surgery, and elective arthroplasty) and in the Padua RAM (hormonal treatment,  
0 and BMI  $> 30$  kg/m<sup>2</sup>) were associated with a reduced risk of VTE.

1 Both Caprini and Padua demonstrated good calibration. The Caprini scores of the cohort ranged from 0-  
2 28 (median, IQR: 4, 3-6, **Figure 1**) with an increasing VTE rate as the score increased, a trend that held until a  
3 score of 15 (**Figure 2**). Padua scores ranged from 0-13 (median, IQR: 1, 1-3, **Figure 1**) and an increasing score  
4 was also associated with an increasing VTE rate (**Figure 2**).

5 **Main results:** The AUC for predicting VTE at 0-90 days in the entire cohort by the Caprini RAM was  
6 0.56 (95% CI 0.56-0.56, **Table 2**). The AUCs for 0-30 and 61-90 day outcomes were no different than for 0-90  
7 days, and for 31-60 day outcome was slightly better than for 0-90 days though the difference was not clinically  
8 important (absolute difference in AUC, 0.02, **Table 2**).

9 The AUC for predicting VTE at 0-90 days in the entire cohort by the Padua RAM was 0.59 (95% CI,  
0 0.58-0.59), and was higher than that for the Caprini RAM ( $p < 0.001$ ) though the difference was of limited  
1 clinical importance (absolute difference in AUC, 0.03, **Table 2**). The AUCs for 0-30, 31-60 and 61-90 day  
2 outcomes were no different from that for 0-90 days (**Table 2**).

3 **Secondary results (Table 4): Prediction by type of patient examined.** In subgroup analyses, the Caprini  
4 and Padua RAMs predicted VTE at 0-90 days better in **1**) non-surgical patients (Caprini AUC 0.59 [95% CI  
5 0.58-0.59], Padua AUC 0.59 [0.59, 0.60]) and worse in **2**) surgical patients (Caprini AUC 0.54 [95% CI 0.53-  
6 0.54], Padua AUC 0.56 [0.56, 0.57]), compared to VTE prediction in the entire cohort ( $< 0.001$  for all four

1 comparisons). Consistent with these findings, prediction in non-surgical patients was better than in surgical  
2 patients, though the difference was of limited clinical importance (absolute difference in AUC=0.05,  $p<0.001$ ,  
3 **Figure 3**). The same was observed for the Padua RAM (absolute difference in AUC=0.03,  $p<0.001$ , **Figure 3**).  
4 Both RAMs performed slightly worse among **3**) patients hospitalized for  $\geq 72$  hours versus all patients (Caprini  
5  $p<0.001$ , Padua  $p<0.001$ ).

6 Prediction by type of outcome examined. The AUCs for prediction of **4**) VTE excluding upper extremity  
7 DVTs by the Caprini or Padua RAMs were similar to the AUCs for all VTEs (Caprini  $p=0.12$ , Padua  $p=0.57$ ).  
8 Both RAMs were slightly better at predicting the **5**) composite outcome of VTE and/or all-cause mortality,  
9 versus VTE alone (Caprini  $p<0.001$ , Padua  $p<0.001$ ) although the differences were of limited clinical  
0 importance (absolute difference of AUCs, Caprini 0.02, Padua 0.01).

1 Prediction by prophylaxis status. A total of 740,632 (59%) patients received VTE prophylaxis (either  
2 mechanical or pharmacologic) and 511,828 (41%) did not; 3.4% of those who received prophylaxis developed a  
3 VTE while 2.1% of those who did not receive prophylaxis developed a VTE ( $p<0.001$ ). **6**) In subgroup  
4 analyses, for **6**) patients who received VTE prophylaxis, the ability to predict VTE at 0-90 days for both RAMs  
5 was worse than for the entire cohort (AUCs: Caprini RAM 0.55 [95% CI 0.54-0.55] and Padua RAM 0.58 [95%  
6 CI 0.57-0.58],  $p<0.001$  vs. respective AUCs for prediction in entire cohort). **7**) For patients who did not receive  
7 VTE prophylaxis, the ability to predict VTE at 0-90 days for both RAMs was better than for the entire cohort  
8 (AUCs: Caprini RAM 0.58 [95% CI 0.57-0.58],  $p<0.001$  and Padua RAM 0.59 [95% CI 0.59-0.60],  $p=0.02$  vs.  
9 respective AUCs for prediction in entire cohort). In an additional analysis, **8**) including prophylaxis as an  
0 exposure variable in the models for each RAM improved prediction of VTE at 0-90 days compared to our base  
1 models (AUCs: Caprini RAM 0.59 [95% CI 0.58-0.59] and Padua RAM 0.61 [95% CI, 0.60-0.61],  $p<0.001$  vs.  
2 respective AUCs in unadjusted models, **Table 5**). The differences were of limited clinical importance (absolute  
3 differences in AUC, Caprini RAM 0.03; Padua RAM 0.02).

## 5 **DISCUSSION**



1 The incidence of VTE within 0-90 days after hospitalization in this nationwide cohort of 1,252,460  
2 unselected consecutive surgical and non-surgical patients was 2.8%. Approximately 28% of VTE events  
3 occurred between 31 and 90 days after admission, highlighting the importance of tracking events beyond the  
4 traditional focus on 30 days. The ability of the Caprini (AUC 0.56) or Padua (AUC 0.59) risk-assessment  
5 models to predict VTE was of limited help in stratifying VTE risk. The performance of both RAMs was better  
6 in non-surgical compared to surgical patients, though the improvements were not large enough to be clinically  
7 important. The RAMs did not demonstrate clinically important improvements in performance when only  
8 patients admitted for  $\geq 72$  hours were examined, after excluding upper-extremity DVT from the outcome, after  
9 including all-cause mortality into the composite outcome, or after accounting for VTE prophylaxis received.  
0 The results do not justify widespread use among general hospital admissions without improvements in the  
1 models and further rigorous validation.

2 Our results confirm that hospital admission confers a risk for VTE. In our study, 2.8% of patients  
3 developed a VTE within 0-90 days of hospitalization. Of these, 42% had a PE, an important cause of VTE-  
4 related mortality. In addition, with several million patients being hospitalized each year, many patients are at  
5 risk for long-term sequelae of VTE such as post-thrombotic syndrome and post-PE syndrome. These iatrogenic  
6 complications can be reduced by prophylactic measures. However, mechanical prophylaxis (e.g., compression)  
7 may not be tolerated or feasible, and pharmacoprophylaxis may increase the risk for bleeding. These risks must  
8 be weighed against the risk for VTE, therefore reliably stratifying VTE risk is a prerequisite to appropriate  
9 prophylaxis.

0 The assessment of predictive performance for the Caprini and Padua RAMs has shown mixed results to  
1 date. They are among the most widely used tools to assess VTE risk. The Caprini RAM has been evaluated in  
2 over 200 studies worldwide though most have had small sample sizes (<10,000 patients) with few VTE events  
3 (<100).<sup>18</sup> The Padua RAM has been evaluated primarily in medical patients with similarly small cohorts.<sup>19,20</sup>  
4 The best performance (AUCs) for the RAMs were obtained in studies with modest numbers of high-risk  
5 patients, often fewer than 1,000.<sup>21-23</sup> The two RAMs have also been compared previously<sup>5,20,23-27</sup>, with the  
6 Caprini RAM showing better prediction for mortality,<sup>20</sup> and a higher AUC to predict VTE (0.77 vs. 0.62 for

1 Padua RAM,  $p < 0.05$ ).<sup>24</sup> Conversely, an analysis of acutely ill medical patients reported low predictive abilities  
2 from both, the Caprini (AUC=0.60) and Padua (AUC=0.64) RAMs.<sup>27</sup> In our larger, nationwide, mixed surgical  
3 and non-surgical cohort, with a large number of VTE events ( $n=35,557$ ), both RAMs had limited predictive  
4 ability for VTE. This may explain why there is limited information on whether broad clinical implementation of  
5 the RAMs reduces VTE rates, even though the tools have been available for several years.<sup>28</sup> A large 43-hospital  
6 Michigan Hospital Medicine Safety Consortium instituted systematic VTE risk-assessment in their hospitalized  
7 patients using primarily the Caprini RAM. Even though risk-assessment and the use of prophylaxis increased,  
8 VTE rates were not reduced.<sup>29</sup>

9 Most VTE events occurred within 0-30 days, though one-quarter occurred between days 31 and 90 post-  
0 admission (**Table 2**). This could still underestimate the true incidence since PE is often overlooked as a cause of  
1 death when it occurs remote from a hospitalization. When we included all-cause mortality into our composite  
2 outcome, prediction by both RAMs improved. While the improvement was not large, the increase suggests that  
3 some of the deaths occurred in individuals with risk-factors for VTE and could have occurred from a PE.  
4 Although we found that hospitalization increased the risk for VTE up to 90 days post-admission, further studies  
5 must assess whether risk extends even beyond 90 days, and compare VTE incidence in age-, sex- and risk  
6 factor-matched non-hospitalized patients to define the true additional risk for VTE conferred by hospitalization.

7 Both RAMs showed good calibration with increasing Caprini RAM scores up to a score of 15 being  
8 associated with increased VTE rates, at which point the small number of patients and events (and resulting  
9 larger confidence intervals) likely contributed to a less linear association (**Figure 2**). Grant et al. also reported  
0 increasing VTE rates up to Caprini scores of 7, after which the rate stayed elevated but without a consistent  
1 rise.<sup>30</sup> Higher Padua scores also demonstrated an increase in VTE rates, consistent with prior reports.<sup>20</sup>

2 There may be several reasons why the association between RAM scores and VTE events did not  
3 translate into better discrimination and prediction of VTE events. Not all risk-factors in the RAMs had a strong  
4 relationship to VTE (**Table 3**). In fact, surprisingly, some risk-factors were protective. One explanation may be  
5 that both RAMs were empirically derived.<sup>26</sup> The Caprini RAM was developed using data from only 538  
6 surgical patients, the Padua RAM from only 1,180 non-surgical patients.<sup>7,9</sup> The prevalence of 13 of the 34 risk-

1 factors in the Caprini RAM were no different between those with versus without VTE, and 5 factors had a  
2 higher prevalence in the no-VTE versus VTE group. Future versions of the RAM must reconsider including  
3 them in the model.

4 Obesity is known to have a 2 to 3 fold higher risk for VTE.<sup>31–33</sup> We found that obesity was not  
5 associated with development of a VTE (**Table 3**). This finding could be related to our study population, older,  
6 mostly male, and with many comorbidities, reducing the overall effect of obesity in our cohort. Exogenous  
7 hormone use, particularly estrogen, is a known risk factor with a 1.5 to 3 fold higher risk of VTE.<sup>31,34</sup> In our  
8 study, hormone use was more prevalent in the non-VTE group. This is likely a function of the low overall  
9 prevalence of hormone use in our population; only 1% of the cohort (n=11,793 patients) had recent (within 30  
0 days) exogenous hormone use, likely due to the small percentage of females (5%).

1 The Caprini RAM has been tested (and is possibly used) more often in surgical patients, while the Padua  
2 RAM has been tested (and possibly used) more often in non-surgical patients. When we assessed for potential  
3 differential performance of the RAMs by patient sub-type, we found that both RAMs performed slightly better  
4 in non-surgical (AUCs: Caprini RAM 0.59, Padua RAM 0.60) compared to surgical patients (**Table 4**). The  
5 differences were not clinically important. It is possible that some risk-factors potentially relevant to VTE risk in  
6 surgical patients are not included in the RAMs (e.g., duration of surgery, type of anesthesia, or organ system  
7 being operated on). Since we included all patients that underwent a procedure during hospitalization, regardless  
8 of the service they were admitted to, it is unlikely that surgeries were missed in the analysis. The findings argue  
9 for an evaluation of a more exhaustive set of risk-factors for inclusion in the RAMs in order to improve  
0 performance.

1 There is no widely used RAM that includes prophylaxis information (that may reduce the risk of VTE),  
2 in its calculation of VTE risk.<sup>6</sup> Studies evaluating the predictive ability of the RAMs have not routinely  
3 accounted for ongoing prophylaxis either.<sup>23–25</sup> We found an improvement in predictive ability of both RAMs  
4 when we included information on ongoing prophylaxis into our model (AUCs: Caprini RAM 0.59, Padua RAM  
5 0.61), and when we tested only those patients that did not receive prophylaxis (AUCs: Caprini RAM 0.58,  
6 Padua RAM 0.59, **Table 4**). Though the improvements were not enough to make them clinically useful, they

1 suggest the importance of incorporating prophylaxis information into any future model, and into future  
2 validation studies. We also found that VTE prophylaxis was associated with a higher risk of VTE. This finding  
3 was also noted in a study of 14,660 hospitalized medical patients, where 57% of patients who developed a VTE  
4 had received prophylaxis, compared to 46% of those that had not ( $p < 0.001$ ).<sup>27</sup> This counterintuitive finding may  
5 reflect the fact that clinicians, either by calculation of a RAM score, or by clinical intuition, identify patients at  
6 high risk for VTE and are more likely to prescribe prophylaxis for these patients. If true, it suggests that the  
7 prescribed prophylaxis is not as effective (i.e., appropriate prophylaxis in the appropriate patient) as needed in  
8 high risk VTE patients to allow VTE prophylaxis to overcome possible bias by indication.

## 9 0 **Limitations**

1 This is the largest evaluation of VTE RAMs using a nationwide unselected population of general  
2 hospital admissions. However, our retrospective study design with reliance on administrative data to define  
3 scores of several risk-factors means that Caprini and Padua RAM scores could be under- or over-estimated  
4 given inaccurate clinical information. Relying on the VA as the data source decreases the generalizability to  
5 female patients and non-VA hospitals. To note though, despite the low fraction of women in our cohort, it is the  
6 largest cohort (total number,  $N=88,079$ ) of women studied for VTE risk-stratification. There is a possibility that  
7 clinical data pertaining to event rates from care obtained at non-VA facilities subsequent to hospital discharge  
8 may have been missed. However, this would result in underestimating the outcome measure and unlikely to bias  
9 our results. Furthermore, the vast majority of Veterans would have returned to VA care and subsequent notes  
0 would reflect any events that would have been treated at a non-VA facility. Given the granularity of the VINCI  
1 database, we were able to evaluate multiple follow-up periods, different outcomes, and perform several  
2 secondary analyses. However, we were not able to include family history in computing the Caprini score as  
3 these data were available for only a small fraction of patients. We were missing BMI data on 4% of patients.  
4 While we had data on if mechanical prophylaxis was ordered for patients, we could not confirm patient  
5 adherence to the therapy. Possible confounding by indication exists, particularly in the analysis of prediction of  
6 VTE in patients receiving and not receiving prophylaxis.

1

## 2 **CONCLUSIONS**

3           The current versions of the Caprini and Padua RAMs have low predictive ability for VTE among  
4 general hospital admissions, for both surgical and non-surgical patients. Implementing and ensuring compliance  
5 for widespread VTE risk-assessment and risk-stratification using standardized risk-assessment models across  
6 large healthcare systems is effort- and resource- intensive. Currently available models must be rigorously  
7 assessed and modified before they are ready for universal adoption.

1 **Sources of Funding:**

2 HH: American Venous Forum (JF2021), T32 (AG000262)

3 BL: VA Merit Award (RX000995)

4 JDS: Baltimore VA GRECC (Geriatric Research, Education and Clinical Center), and NIH NIA

5 (P30AG028747)

6

7 **Disclosures:**

8 Hilary Hayssen, MD, none

9 Shalini Sahoo, MA, none

0 Phuong Nguyen, PhD, none

1 Minerva Mayorga-Carlin, MPH, none

2 Tariq Siddiqui, MS, none

3 Brian Englum, MD, none

4 Julia F Slejko, PhD, none

5 C. Daniel Mullins, PhD, has served as a consultant to Bayer, Incyte, Merck, Pfizer and Takeda during the last  
6 three years

7 Yelena Yesha, PhD, none

8 John D Sorkin, MD, PhD, none

9 Brajesh K Lal, MD, none

0

## 1 REFERENCES

- 2 1. Beckman MG, Hooper WC, Critchley SE, Ortel TL. Venous Thromboembolism. *Am J Prev Med*.  
3 2010;38(4):S495-S501. doi:10.1016/j.amepre.2009.12.017
- 4 2. CDC. Impact of Blood Clots on the United States | CDC. Centers for Disease Control and Prevention.  
5 Published October 19, 2018. Accessed December 17, 2021. [https://www.cdc.gov/ncbddd/dvt/infographic-](https://www.cdc.gov/ncbddd/dvt/infographic-impact.html)  
6 [impact.html](https://www.cdc.gov/ncbddd/dvt/infographic-impact.html)
- 7 3. Office of the Surgeon General, National Heart Lung and Blood Institute. The Surgeon General's Call to  
8 Action to Prevent Deep Vein Thrombosis and Pulmonary Embolism. Published online 2008.
- 9 4. Woller S. CDC, Joint Commission Engage in VTE Prevention Research. The Joint Commission. Published  
0 August 19, 2021. Accessed August 10, 2022. [https://www.jointcommission.org/resources/news-and-](https://www.jointcommission.org/resources/news-and-multimedia/blogs/improvement-insights/2021/08/cdc-and-joint-commission-engage-in-vte-prevention-research/)  
1 [multimedia/blogs/improvement-insights/2021/08/cdc-and-joint-commission-engage-in-vte-prevention-](https://www.jointcommission.org/resources/news-and-multimedia/blogs/improvement-insights/2021/08/cdc-and-joint-commission-engage-in-vte-prevention-research/)  
2 [research/](https://www.jointcommission.org/resources/news-and-multimedia/blogs/improvement-insights/2021/08/cdc-and-joint-commission-engage-in-vte-prevention-research/)
- 3 5. Pandor A, Tonkins M, Goodacre S, et al. Risk assessment models for venous thromboembolism in  
4 hospitalised adult patients: a systematic review. *BMJ Open*. 2021;11(7):e045672. doi:10.1136/bmjopen-  
5 2020-045672
- 6 6. Darzi AJ, Repp AB, Spencer FA, et al. Risk-assessment models for VTE and bleeding in hospitalized  
7 medical patients: An overview of systematic reviews. *Blood Adv*. 2020;4(19):4929-4944.  
8 doi:10.1182/BLOODADVANCES.2020002482
- 9 7. Caprini JA, Arcelus JI, Hasty JH, Tamhane AC, Fabrega F. Clinical assessment of venous thromboembolic  
0 risk in surgical patients. *Semin Thromb Hemost*. 1991;17(3):304-312.
- 1 8. Cronin M, Dengler N, Krauss ES, et al. Completion of the Updated Caprini Risk Assessment Model (2013  
2 Version). *Clin Appl Thromb*. 2019;25:107602961983805. doi:10.1177/1076029619838052

- 1 9. Barbar S, Noventa F, Rossetto V, et al. A risk assessment model for the identification of hospitalized  
2 medical patients at risk for venous thromboembolism: the Padua Prediction Score: Padua Prediction Score.  
3 *J Thromb Haemost.* 2010;8(11):2450-2457. doi:10.1111/j.1538-7836.2010.04044.x
- 4 10. Gerotziafas GT, Papageorgiou L, Salta S, Nikolopoulou K, Elalamy I. Updated clinical models for VTE  
5 prediction in hospitalized medical patients. *Thromb Res.* 2018;164:S62-S69.  
6 doi:10.1016/j.thromres.2018.02.004
- 7 11. Kahn SR, Lim W, Dunn AS, et al. Prevention of VTE in Nonsurgical Patients. *Chest.* 2012;141(2):e195S-  
8 e226S. doi:10.1378/chest.11-2296
- 9 12. Gould MK, Garcia DA, Wren SM, et al. Prevention of VTE in nonorthopedic surgical patients.  
0 Antithrombotic therapy and prevention of thrombosis, 9th ed: American College of Chest Physicians  
1 evidence-based clinical practice guidelines. *Chest.* 2012;141(2 SUPPL.):e227S-e277S.  
2 doi:10.1378/chest.11-2297
- 3 13. Chamoun N, Matta S, Aderian SS, et al. A Prospective Observational Cohort of Clinical Outcomes in  
4 Medical Inpatients prescribed Pharmacological Thromboprophylaxis Using Different Clinical Risk  
5 Assessment Models(COMPT RAMs). *Sci Rep.* 2019;9(1):18366. doi:10.1038/s41598-019-54842-3
- 6 14. von Elm E, Altman DG, Egger M, et al. Strengthening the Reporting of Observational Studies in  
7 Epidemiology (STROBE) statement: guidelines for reporting observational studies. *BMJ.*  
8 2007;335(7624):806-808. doi:10.1136/bmj.39335.541782.AD
- 9 15. Veterans Affairs Health Administration. Providing Health Care for Veterans. *US Dep Veterans Aff.*  
0 Published online 2020. <https://www.va.gov/health/>
- 1 16. U.S. Department of Veterans Affairs. VA Informatics and Computing Infrastructure (VINCI) homepage.  
2 2018. [https://www.hsr.d.research.va.gov/for\\_researchers/vinci/](https://www.hsr.d.research.va.gov/for_researchers/vinci/)



- 1 17. DeLong ER, DeLong DM, Clarke-Pearson DL. Comparing the Areas under Two or More Correlated  
2 Receiver Operating Characteristic Curves: A Nonparametric Approach. *Biometrics*. 1988;44(3):837-845.  
3 doi:10.2307/2531595
- 4 18. Hayssen H, Cires-Drouet R, Englum B, et al. Systematic review of venous thromboembolism risk  
5 categories derived from Caprini score. *J Vasc Surg Venous Lymphat Disord*. 2022;10(6):1401-1409.e7.  
6 doi:10.1016/j.jvsv.2022.05.003
- 7 19. Nendaz M, Spirk D, Kucher N, et al. Multicentre validation of the Geneva Risk Score for hospitalised  
8 medical patients at risk of venous thromboembolism. Explicit ASsessment of Thromboembolic RIsk and  
9 Prophylaxis for Medical PATients in SwitzERland (ESTIMATE). *Thromb Haemost*. 2014;111(3):531-538.  
0 doi:10.1160/TH13-05-0427
- 1 20. Zhou H, Hu Y, Li X, et al. Assessment of the Risk of Venous Thromboembolism in Medical Inpatients  
2 using the Padua Prediction Score and Caprini Risk Assessment Model. *J Atheroscler Thromb*.  
3 2018;25(11):1091-1104. doi:10.5551/jat.43653
- 4 21. Lobastov K, Barinov V, Schastlivtsev I, Laberko L, Rodoman G, Boyarintsev V. Validation of the Caprini  
5 risk assessment model for venous thromboembolism in high-risk surgical patients in the background of  
6 standard prophylaxis. *J Vasc Surg Venous Lymphat Disord*. 2016;4(2):153-160.  
7 doi:10.1016/j.jvsv.2015.09.004
- 8 22. Shang MM, Yan R, Wang XL, Gong WP, Guo ZQ. Comparison of 2013 and 2009 versions of Caprini risk  
9 assessment models for predicting VTE in Chinese cancer patients: a retrospective study. *J Thromb*  
0 *Thrombolysis*. 2020;50(2):446-451. doi:10.1007/s11239-020-02038-2
- 1 23. Tian B, Li H, Cui S, Song C, Li T, Hu B. A novel risk assessment model for venous thromboembolism  
2 after major thoracic surgery: a Chinese single-center study. *J Thorac Dis*. 2019;11(5):1903-1910.  
3 doi:10.21037/jtd.2019.05.11

- 1 24. Chen X, Pan L, Deng H, et al. Risk Assessment in Chinese Hospitalized Patients Comparing the Padua and  
2 Caprini Scoring Algorithms. *Clin Appl Thromb*. 2018;24(9\_suppl):127S-135S.  
3 doi:10.1177/1076029618797465
- 4 25. Liu X, Liu C, Chen X, Wu W, Lu G. Comparison between Caprini and Padua risk assessment models for  
5 hospitalized medical patients at risk for venous thromboembolism: a retrospective study. *Interact*  
6 *Cardiovasc Thorac Surg*. 2016;23(4):538-543. doi:10.1093/icvts/ivw158
- 7 26. Stuck AK, Spirk D, Schaudt J, Kucher N. Risk assessment models for venous thromboembolism in acutely  
8 ill medical patients: A systematic review. *Thromb Haemost*. 2017;117(4):801-808. doi:10.1160/TH16-08-  
9 0631
- 0 27. Moumneh T, Riou J, Douillet D, et al. Validation of risk assessment models predicting venous  
1 thromboembolism in acutely ill medical inpatients: A cohort study. *J Thromb Haemost*. 2020;18(6):1398-  
2 1407. doi:10.1111/jth.14796
- 3 28. Bullock-Palmer RP, Weiss S, Hyman C. Innovative approaches to increase deep vein thrombosis  
4 prophylaxis rate resulting in a decrease in hospital-acquired deep vein thrombosis at a tertiary-care  
5 teaching hospital. *J Hosp Med*. 2008;3(2):148-155. doi:10.1002/jhm.291
- 6 29. Flanders SA, Greene MT, Grant P, et al. Hospital performance for pharmacologic venous  
7 thromboembolism prophylaxis and rate of venous thromboembolism : a cohort study. *JAMA Intern Med*.  
8 2014;174(10):1577-1584. doi:10.1001/jamainternmed.2014.3384
- 9 30. Grant PJ, Greene MT, Chopra V, Bernstein SJ, Hofer TP, Flanders SA. Assessing the Caprini Score for  
0 Risk Assessment of Venous Thromboembolism in Hospitalized Medical Patients. *Am J Med*.  
1 2016;129(5):528-535. doi:10.1016/j.amjmed.2015.10.027
- 2 31. Cushman M. *Epidemiology and Risk Factors for Venous Thrombosis*. <http://www.nhlbisupport.com/bmi>

- 1 32. Abdollahi M, Cushman M, Rosendaal FR. Obesity: risk of venous thrombosis and the interaction with  
2 coagulation factor levels and oral contraceptive use. *Thromb Haemost.* 2003;89(3):493-498.
- 3 33. Stein PD, Beemath A, Olson RE. Obesity as a risk factor in venous thromboembolism. *Am J Med.*  
4 2005;118(9):978-980. doi:10.1016/j.amjmed.2005.03.012
- 5 34. Crous-Bou M, Harrington LB, Kabrhel C. Environmental and Genetic Risk Factors Associated with  
6 Venous Thromboembolism. *Semin Thromb Hemost.* 2016;42(8):808-820. doi:10.1055/s-0036-1592333
- 7
- 8

Table 1: Clinical characteristics of study cohort

| <b>Variables</b>                               | <b>All<br/>N=1,252,460</b> | <b>VTE Group<br/>N=35,557 (2.8%)</b> | <b>Non-VTE Group<br/>N=1,216,903 (97.2%)</b> | <b>P-value*</b> |
|------------------------------------------------|----------------------------|--------------------------------------|----------------------------------------------|-----------------|
| Age, years, mean (SD)                          | 65.9 (13.8)                | 68.1 (12.0)                          | 65.8 (13.8)                                  | <0.001          |
| Sex, N (%)                                     |                            |                                      |                                              | <0.001          |
| Male                                           | 1,164,380 (93.0)           | 33,846 (95.2)                        | 1,130,534 (92.9)                             |                 |
| Female                                         | 88,079 (7.0)               | 1,711 (4.8)                          | 86,368 (7.1)                                 |                 |
| Race, N (%)                                    |                            |                                      |                                              | <0.001          |
| White                                          | 891,379 (71.2)             | 24,112 (67.8)                        | 867,267 (71.3)                               |                 |
| Black                                          | 261,905 (20.9)             | 8,656 (24.3)                         | 253,249 (20.8)                               |                 |
| All others                                     | 82,256 (6.6)               | 2,250 (6.3)                          | 82,170 (6.7)                                 |                 |
| Body Mass Index, kg/m <sup>2</sup> , mean (SD) | 29.3 (6.8)                 | 29.2 (7.1)                           | 29.3 (6.7)                                   | 0.018           |
| Hospital Length of Stay, days, mean (SD)       | 4.1 (11.3)                 | 8.7 (23.5)                           | 3.9 (10.7)                                   | <0.001          |
| Patient classification, N (%)                  |                            |                                      |                                              | <0.001          |
| Surgical                                       | 330,388 (26.4)             | 8,064 (22.7)                         | 322,324 (26.5)                               |                 |
| Non-Surgical                                   | 922,072 (73.6)             | 27,493 (77.3)                        | 894,579 (73.5)                               |                 |
| Prophylaxis Type, N (%)                        |                            |                                      |                                              |                 |
| Prophylaxis (mechanical and/or pharmacologic)  | 740,632 (59.1)             | 24,899 (70.0)                        | 715,733 (58.8)                               | <0.001          |
| None                                           | 511,828 (40.9)             | 10,658 (30.0)                        | 501,170 (41.2)                               |                 |

\* *P-values computed with Pearson Chi-Square test*

*Abbreviations: SD, standard deviation; VTE venous thromboembolism*

Table 2: Distribution of VTE events and area under the receiver operating characteristic curves (AUC) for Caprini and Padua scores to predict a VTE after 1,252,460 unique consecutive unselected surgical and non-surgical hospital admissions nationwide.

| Time from hospital admission | VTE type, N |          |          | Total VTE events N (%) | Caprini RAM       |                   | Padua RAM         |                   |
|------------------------------|-------------|----------|----------|------------------------|-------------------|-------------------|-------------------|-------------------|
|                              | PE only     | PE & DVT | DVT only |                        | AUC (95% CI)      | p-value *         | AUC (95% CI)      | p-value *         |
| 0-30 days                    | 8,093       | 3,144    | 14,371   | 25,608 (72)            | 0.56 (0.55, 0.56) | 0.07              | 0.58 (0.58, 0.59) | 0.58              |
| 31-60 days                   | 1,709       | 620      | 3,622    | 5,951 (17)             | 0.58 (0.57, 0.58) | <0.001            | 0.59 (0.58, 0.60) | 0.15              |
| 61-90 days                   | 1,138       | 352      | 2,508    | 3,998 (11)             | 0.56 (0.55, 0.57) | 0.47              | 0.58 (0.57, 0.59) | 0.69              |
| 0-90 days                    | 10,940      | 4,116    | 20,501   | 35,557 (100)           | 0.56 (0.56, 0.56) | <b>1.00 (ref)</b> | 0.59 (0.58, 0.59) | <b>1.00 (ref)</b> |

\* 0-30, 31-60, 61-90 day AUCs are compared to the 0-90 day AUCs (reference group) within each risk assessment model. Comparisons were made within each RAM using the Delong-Delong test.

Abbreviations: VTE, venous thromboembolism; RAM, risk assessment model; PE, pulmonary embolism; DVT, deep vein thrombosis; CI, confidence interval

Table 3: Distribution of Caprini <sup>a</sup> and Padua <sup>b</sup> risk-factors at admission

| Risk factor                        | Caprini Points | Padua Points | VTE %<br>n=35,557 | No VTE %<br>n=1,216,903 | p-value <sup>c</sup> |
|------------------------------------|----------------|--------------|-------------------|-------------------------|----------------------|
| Age 41-60 years old                | 1              | -            | 18.9              | 22.8                    | <0.001               |
| Planned minor surgery              | 1              | -            | 1.3               | 2.7                     | <0.001               |
| Varicose veins                     | 1              | -            | 0.4               | 0.2                     | <0.001               |
| Recent major surgery               | 1              | -            | 0.9               | 0.7                     | <0.001               |
| Inflammatory bowel disease         | 1              | -            | 3.3               | 3.7                     | <0.001               |
| Swollen legs                       | 1              | -            | 1.2               | 0.6                     | <0.001               |
| BMI $\geq 25$ kg/m <sup>2</sup>    | 1              | -            | 68.4              | 70.7                    | <0.001               |
| Heart attack                       | 1              | -            | 4.0               | 2.9                     | <0.001               |
| Congestive heart failure           | 1              | -            | 12.9              | 10.1                    | <0.001               |
| Serious infection                  | 1              | -            | 22.3              | 15.5                    | <0.001               |
| Lung disease                       | 1              | -            | 16.8              | 16.2                    | 0.0015               |
| Bed rest <72 hours                 | 1              | -            | 1.3               | 1.4                     | 0.823                |
| Hormone therapy                    | 1              | 1            | 0.5               | 1.0                     | <0.001               |
| Pregnancy                          | 1              | -            | 0.0               | 0.0                     | 0.803                |
| History of stillbirth              | 1              | -            | 0.0               | 0.0                     | 0.530                |
| Age 61-74 years old                | 2              | -            | 52.5              | 48.0                    | <0.001               |
| Cancer                             | 2              | -            | 34.7              | 27.7                    | <0.001               |
| Planned major surgery              | 2              | -            | 14.3              | 20.4                    | <0.001               |
| Leg cast or mold                   | 2              | -            | 0.03              | 0.04                    | 0.764                |
| Central venous catheter            | 2              | -            | 2.3               | 1.1                     | <0.001               |
| Age $\geq 75$ years old            | 3              | -            | 25.8              | 22.9                    | <0.001               |
| Bed rest $\geq 72$ hours           | 3              | 3            | 1.4               | 0.6                     | <0.001               |
| History of VTE                     | 3              | 3            | 7.4               | 1.5                     | <0.001               |
| Family history of VTE <sup>d</sup> | 3              | -            | -                 | -                       | -                    |
| History of clotting disorder       | 3              | -            | 1.7               | 0.6                     | <0.001               |
| Elective arthroplasty              | 5              | -            | 3.5               | 3.9                     | <0.001               |
| Broken hip, pelvis, or leg         | 5              | -            | 1.6               | 1.1                     | <0.001               |
| Serious trauma                     | 5              | -            | 0.0               | 0.0                     | <0.001               |
| Spinal cord injury                 | 5              | -            | 0.2               | 0.1                     | 0.0010               |
| Stroke                             | 5              | -            | 4.1               | 4.1                     | 0.937                |
| BMI $\geq 30$ kg/m <sup>2</sup>    | -              | 1            | 38.7              | 39.5                    | 0.0020               |

|                                     |   |   |      |      |        |
|-------------------------------------|---|---|------|------|--------|
| Infection or rheumatologic disorder | - | 1 | 25.7 | 21.1 | <0.001 |
| Heart attack and/or stroke          | - | 1 | 6.4  | 5.7  | <0.001 |
| Heart and/or respiratory failure    | - | 1 | 16.8 | 11.5 | <0.001 |
| Age $\geq 70$                       | - | 1 | 46.6 | 41.2 | <0.001 |
| Recent trauma and/or surgery        | - | 2 | 0.9  | 0.7  | <0.001 |
| Thrombophilia                       | - | 3 | 1.6  | 0.4  | <0.001 |
| Active cancer                       | - | 3 | 28.4 | 21.1 | <0.001 |

<sup>a</sup> The most recent version of the risk assessment model was used (2013).<sup>8</sup>

<sup>b</sup> The most recent version of the risk assessment model was used (2010).<sup>9</sup>

<sup>c</sup> P-values computed with Pearson Chi-Square test

<sup>d</sup> Unable to extract this information from the medical record; the item was dropped from the computation of the Caprini score

Abbreviations: OR, Odds ratio; VTE, venous thromboembolism; BMI, body mass index; CI, confidence interval

1 Table 4. Secondary analyses of the Caprini and Padua risk assessment models for venous thromboembolism outcomes within 0-90  
 2 days of hospital admission.  
 3

| Characteristic Examined                                                                   | Model # | Analytic approach                                           | Patients analyzed (N) | Events (N) | Caprini RAM       |                      | Padua RAM         |                      |
|-------------------------------------------------------------------------------------------|---------|-------------------------------------------------------------|-----------------------|------------|-------------------|----------------------|-------------------|----------------------|
|                                                                                           |         |                                                             |                       |            | AUC (95% CI)      | P-value <sup>a</sup> | AUC (95% CI)      | P-value <sup>a</sup> |
| Predictive ability for VTE in entire cohort (serves as reference for subsequent analyses) | 0       | Full cohort analysis for all bleeding events                | 1,252,460             | 35,557     | 0.56 (0.56, 0.56) | 1.00 (ref)           | 0.59 (0.58, 0.59) | 1.00 (ref)           |
| Predictive ability for VTE by type of patient                                             | 1       | Subgroup analysis of non-surgical patients                  | 922,072               | 27,493     | 0.59 (0.58, 0.59) | <0.001               | 0.59 (0.59, 0.60) | <0.001               |
|                                                                                           | 2       | Subgroup analysis of surgical patients                      | 330,388               | 8,064      | 0.54 (0.53, 0.54) | <0.001               | 0.56 (0.56, 0.57) | <0.001               |
|                                                                                           | 3       | Subgroup analysis of patients admitted for ≥72 hours        | 442,644               | 21,280     | 0.53 (0.52, 0.53) | <0.001               | 0.56 (0.56, 0.57) | <0.001               |
| Predictive ability for different outcomes in entire cohort                                | 4       | Full cohort analysis for excluding upper extremity DVTs     | 1,252,460             | 31,602     | 0.56 (0.56, 0.57) | 0.12                 | 0.59 (0.58, 0.59) | 0.57                 |
|                                                                                           | 5       | Full cohort analysis for VTE and/or all-cause mortality     | 1,252,460             | 107,684    | 0.58 (0.58, 0.58) | <0.001               | 0.60 (0.60, 0.60) | <0.001               |
| Predictive ability for VTE by prophylaxis status                                          | 6       | Subgroup analysis of patients receiving VTE prophylaxis     | 740,632               | 24,899     | 0.55 (0.54, 0.55) | <0.001               | 0.58 (0.57, 0.58) | <0.001               |
|                                                                                           | 7       | Subgroup analysis of patients not receiving VTE prophylaxis | 511,828               | 10,658     | 0.58 (0.57, 0.58) | <0.001               | 0.59 (0.59, 0.60) | 0.02                 |
|                                                                                           | 8       | Full cohort analysis adjusted for prophylaxis status        | 1,252,460             | 35,557     | 0.59 (0.58, 0.59) | <0.001               | 0.61 (0.60, 0.61) | <0.001               |

4  
 5 <sup>a</sup> The AUC of models 1 through 8 were compared to baseline model 0. Comparisons were made within each RAM using the Delong-Delong test.  
 6

7 Abbreviations: RAM, risk assessment model; AUC, area under the receiver operating characteristic curve; CI, confidence interval; DVT, deep vein thrombosis



1 Figure 1. Distribution of (A) Caprini scores and (B) Padua scores at the time of admission from  
2 the first admission of 1,252,460 consecutively hospitalized surgical and non-surgical patients.  
3 Patient who did not develop a VTE event within 90-days of hospital admission on the **left** and  
4 patients that developed a VTE event within 90-days of hospital admission on the **right**.  
5 *Abbreviations: VTE, venous thromboembolism; SD, standard deviation; IQR, inter-quartile*  
6 *range.*

7  
8 Figure 1A

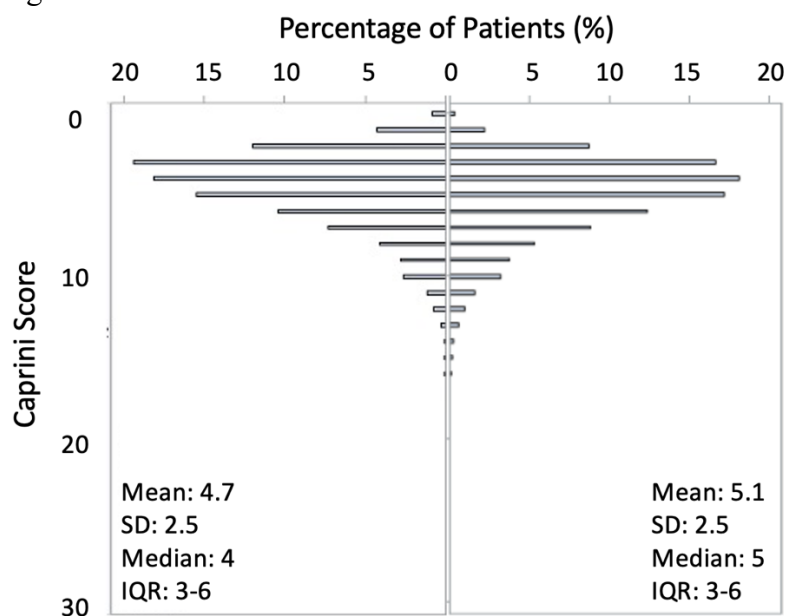

9  
10

11 Figure 1B

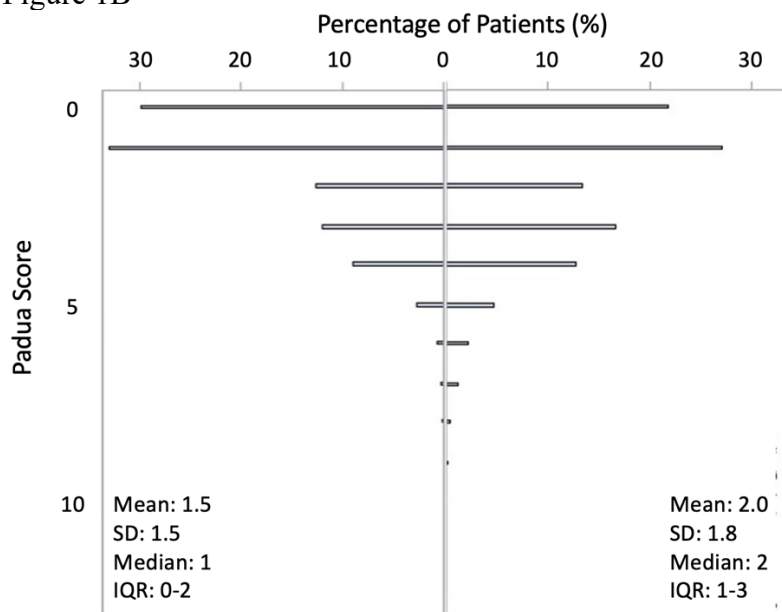

12  
13  
14

1 Figure 2. Distribution of VTE rates by risk assessment model score in 1,252,460 consecutively  
2 hospitalized surgical and non-surgical patients at the time of their admission. A) Caprini score,  
3 B) Padua score. *Abbreviations: VTE, venous thromboembolism; The Error bar represents the*  
4 *upper bar of 95% confidence interval*

6 Figure 2A. Distribution of VTE rate by Caprini score

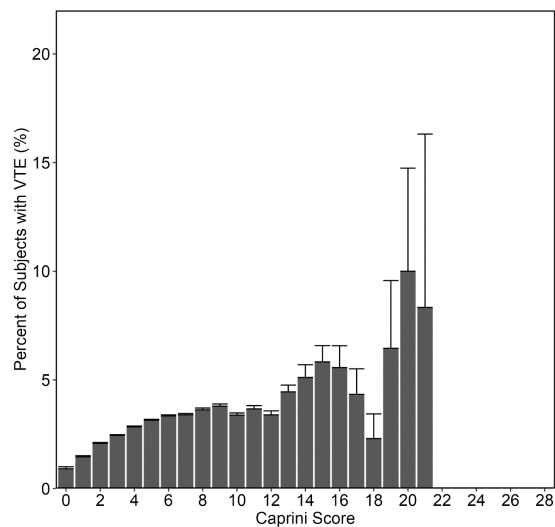

23 Figure 2B. Distribution of VTE rate by Padua score

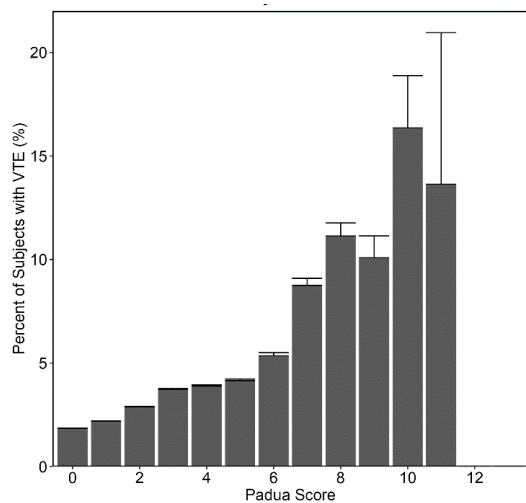

1 Figure 3: Receiver operating characteristic (ROC) curves demonstrating the ability of the A)  
2 Caprini and B) Padua risk assessment models to predict a venous thromboembolism (VTE) event  
3 within 0-90 days of hospital admission. Each graph demonstrates the ROC curve for surgical  
4 (blue) and non-surgical (red) patients computed separately. *Abbreviations: AUC, area under the*  
5 *curve, the confidence intervals are provided within brackets)*  
6

7 Figure 3A. Caprini RAM and AUC for surgical versus non-surgical patients ( $p < 0.001$ ).  
8

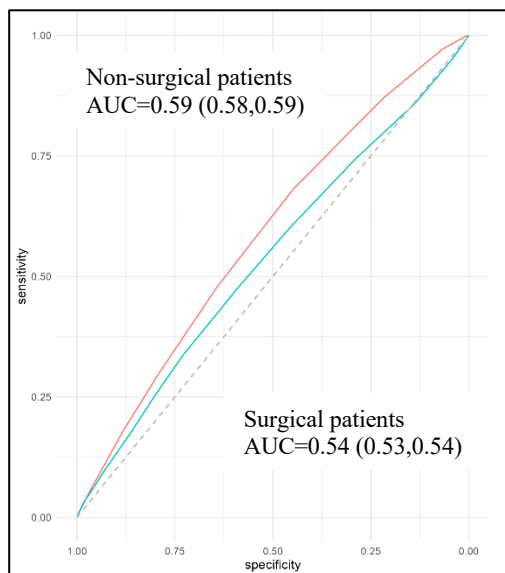

23  
24  
25 Figure 3B. Padua RAM and AUC for surgical versus non-surgical patients ( $p < 0.001$ ).  
26

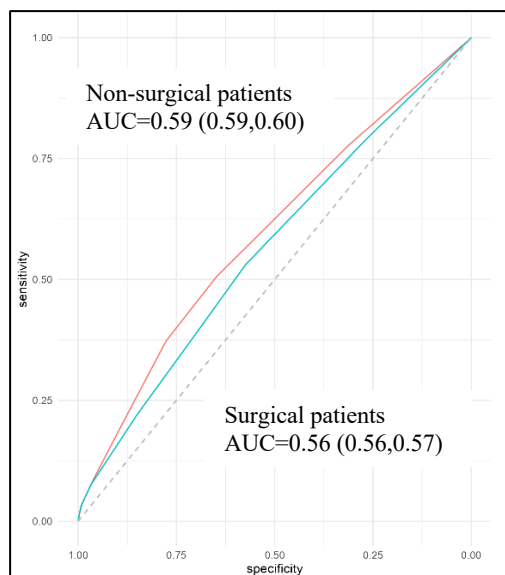

1 Table S1: List of ICD-10 Codes for Diagnosis of Venous Thromboembolism  
2

| ICD 10 Code | Description                                                                              |
|-------------|------------------------------------------------------------------------------------------|
| I2601       | Septic pulmonary embolism with acute cor pulmonale                                       |
| I2602       | Saddle embolus of pulmonary artery with acute cor pulmonale                              |
| I2609       | Other pulmonary embolism with acute cor pulmonale                                        |
| I2690       | Septic pulmonary embolism without acute cor pulmonale                                    |
| I2692       | Saddle embolus of pulmonary artery without acute cor pulmonale                           |
| I2693       | Single subsegmental pulmonary embolism without acute cor pulmonale                       |
| I2694       | Multiple subsegmental pulmonary emboli without acute cor pulmonale                       |
| I2699       | Other pulmonary embolism without acute cor pulmonale                                     |
| I81         | Portal vein thrombosis                                                                   |
| I820        | Budd-Chiari syndrome                                                                     |
| I82210      | Acute embolism and thrombosis of superior vena cava                                      |
| I82220      | Acute embolism and thrombosis of inferior vena cava                                      |
| I82290      | Acute embolism and thrombosis of other thoracic veins                                    |
| I823        | Embolism and thrombosis of renal vein                                                    |
| I82401      | Acute embolism and thrombosis of unspecified deep veins of right lower extremity         |
| I82402      | Acute embolism and thrombosis of unspecified deep veins of left lower extremity          |
| I82403      | Acute embolism and thrombosis of unspecified deep veins of lower extremity, bilateral    |
| I82409      | Acute embolism and thrombosis of unspecified deep veins of unspecified lower extremity   |
| I82411      | Acute embolism and thrombosis of right femoral vein                                      |
| I82412      | Acute embolism and thrombosis of left femoral vein                                       |
| I82413      | Acute embolism and thrombosis of femoral vein, bilateral                                 |
| I82419      | Acute embolism and thrombosis of unspecified femoral vein                                |
| I82421      | Acute embolism and thrombosis of right iliac vein                                        |
| I82422      | Acute embolism and thrombosis of left iliac vein                                         |
| I82423      | Acute embolism and thrombosis of iliac vein, bilateral                                   |
| I82429      | Acute embolism and thrombosis of unspecified iliac vein                                  |
| I82431      | Acute embolism and thrombosis of right popliteal vein                                    |
| I82432      | Acute embolism and thrombosis of left popliteal vein                                     |
| I82433      | Acute embolism and thrombosis of popliteal vein, bilateral                               |
| I82439      | Acute embolism and thrombosis of unspecified popliteal vein                              |
| I82441      | Acute embolism and thrombosis of right tibial vein                                       |
| I82442      | Acute embolism and thrombosis of left tibial vein                                        |
| I82443      | Acute embolism and thrombosis of tibial vein, bilateral                                  |
| I82449      | Acute embolism and thrombosis of unspecified tibial vein                                 |
| I82451      | Acute embolism and thrombosis of right peroneal vein                                     |
| I82452      | Acute embolism and thrombosis of left peroneal vein                                      |
| I82453      | Acute embolism and thrombosis of peroneal vein, bilateral                                |
| I82459      | Acute embolism and thrombosis of unspecified peroneal vein                               |
| I82461      | Acute embolism and thrombosis of right calf muscular vein                                |
| I82462      | Acute embolism and thrombosis of left calf muscular vein                                 |
| I82463      | Acute embolism and thrombosis of calf muscular vein, bilateral                           |
| I82469      | Acute embolism and thrombosis of unspecified calf muscular vein                          |
| I82491      | Acute embolism and thrombosis of other specified deep vein of right lower extremity      |
| I82492      | Acute embolism and thrombosis of other specified deep vein of left lower extremity       |
| I82493      | Acute embolism and thrombosis of other specified deep vein of lower extremity, bilateral |

|        |                                                                                                 |
|--------|-------------------------------------------------------------------------------------------------|
| I82499 | Acute embolism and thrombosis of other specified deep vein of unspecified lower extremity       |
| I824Y1 | Acute embolism and thrombosis of unspecified deep veins of right proximal lower extremity       |
| I824Y2 | Acute embolism and thrombosis of unspecified deep veins of left proximal lower extremity        |
| I824Y3 | Acute embolism and thrombosis of unspecified deep veins of proximal lower extremity, bilateral  |
| I824Y9 | Acute embolism and thrombosis of unspecified deep veins of unspecified proximal lower extremity |
| I824Z1 | Acute embolism and thrombosis of unspecified deep veins of right distal lower extremity         |
| I824Z2 | Acute embolism and thrombosis of unspecified deep veins of left distal lower extremity          |
| I824Z3 | Acute embolism and thrombosis of unspecified deep veins of distal lower extremity, bilateral    |
| I824Z9 | Acute embolism and thrombosis of unspecified deep veins of unspecified distal lower extremity   |
| I82601 | Acute embolism and thrombosis of unspecified veins of right upper extremity                     |
| I82602 | Acute embolism and thrombosis of unspecified veins of left upper extremity                      |
| I82603 | Acute embolism and thrombosis of unspecified veins of upper extremity, bilateral                |
| I82609 | Acute embolism and thrombosis of unspecified veins of unspecified upper extremity               |
| I82621 | Acute embolism and thrombosis of deep veins of right upper extremity                            |
| I82622 | Acute embolism and thrombosis of deep veins of left upper extremity                             |
| I82623 | Acute embolism and thrombosis of deep veins of upper extremity, bilateral                       |
| I82629 | Acute embolism and thrombosis of deep veins of unspecified upper extremity                      |
| I82A11 | Acute embolism and thrombosis of right axillary vein                                            |
| I82A12 | Acute embolism and thrombosis of left axillary vein                                             |
| I82A13 | Acute embolism and thrombosis of axillary vein, bilateral                                       |
| I82A19 | Acute embolism and thrombosis of unspecified axillary vein                                      |
| I82B11 | Acute embolism and thrombosis of right subclavian vein                                          |
| I82B12 | Acute embolism and thrombosis of left subclavian vein                                           |
| I82B13 | Acute embolism and thrombosis of subclavian vein, bilateral                                     |
| I82B19 | Acute embolism and thrombosis of unspecified subclavian vein                                    |
| I82C11 | Acute embolism and thrombosis of right internal jugular vein                                    |
| I82C12 | Acute embolism and thrombosis of left internal jugular vein                                     |
| I82C13 | Acute embolism and thrombosis of internal jugular vein, bilateral                               |
| I82C19 | Acute embolism and thrombosis of unspecified internal jugular vein                              |
| I82890 | Acute embolism and thrombosis of other specified veins                                          |
| I8290  | Acute embolism and thrombosis of unspecified vein                                               |
